# Supplementary material
Source: PubMed Central journal article supplement (PMC11107589)

**A**

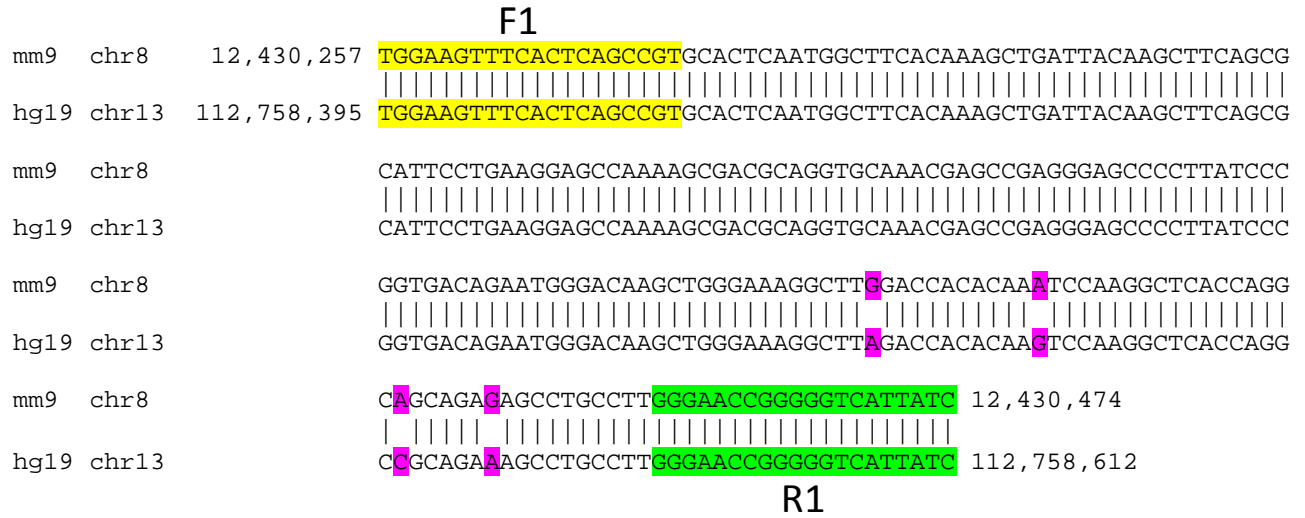

**B**

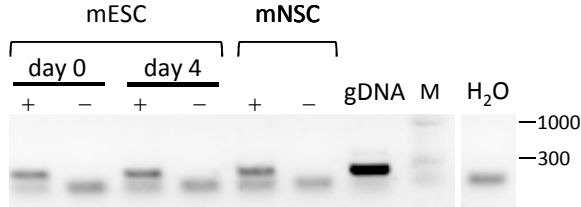

**C**

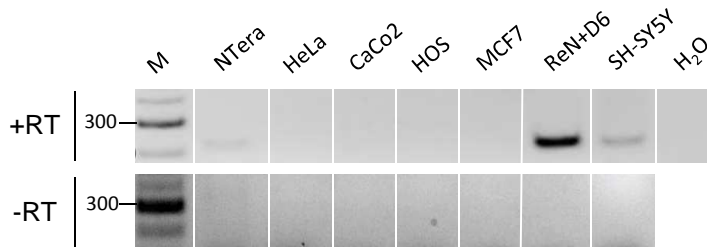

Supplement: 18_2017_2580_MOESM2_ESM.pdf [file 18_2017_2580_MOESM2_ESM.pdf]
