# Supplementary material
Source: PubMed Central journal article supplement (PMC11107589)

# Supplementary Figure 4

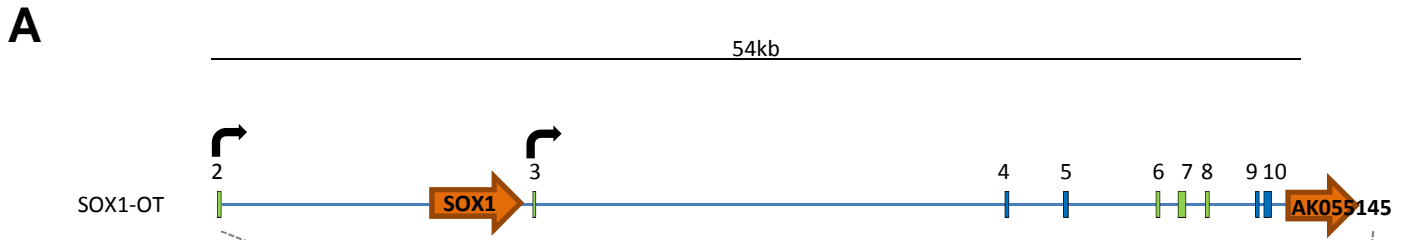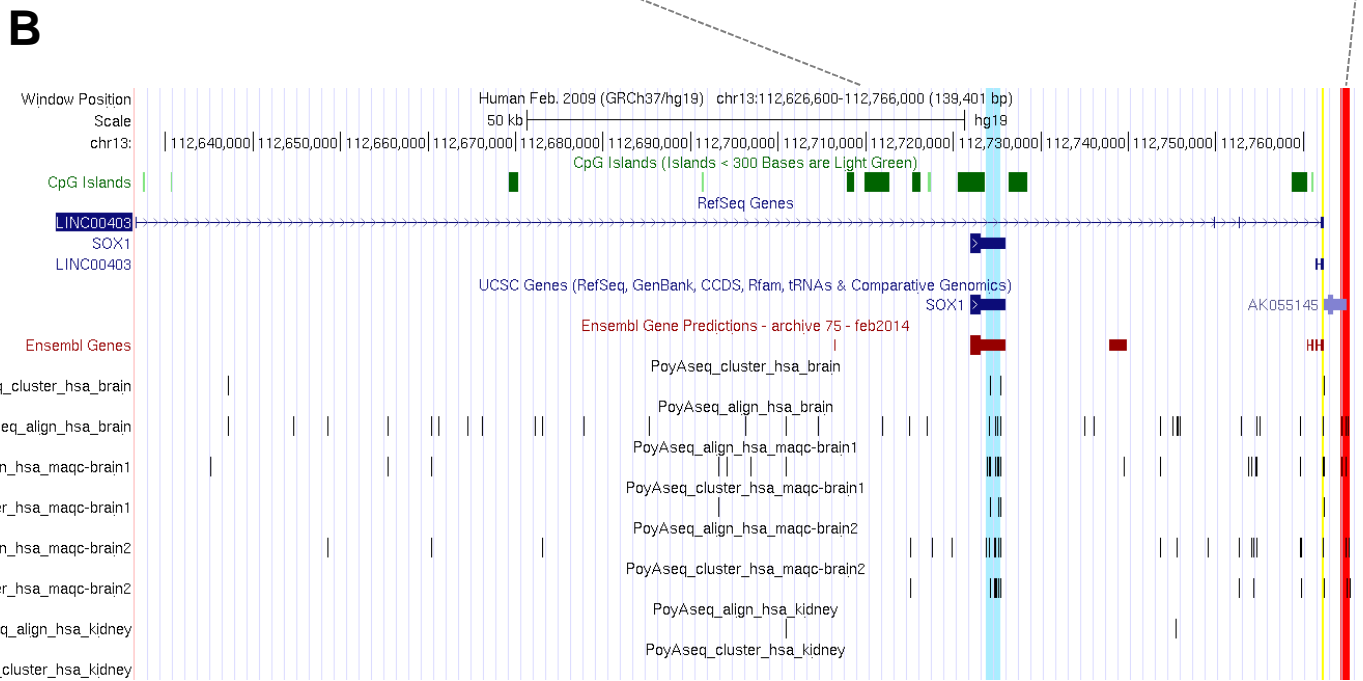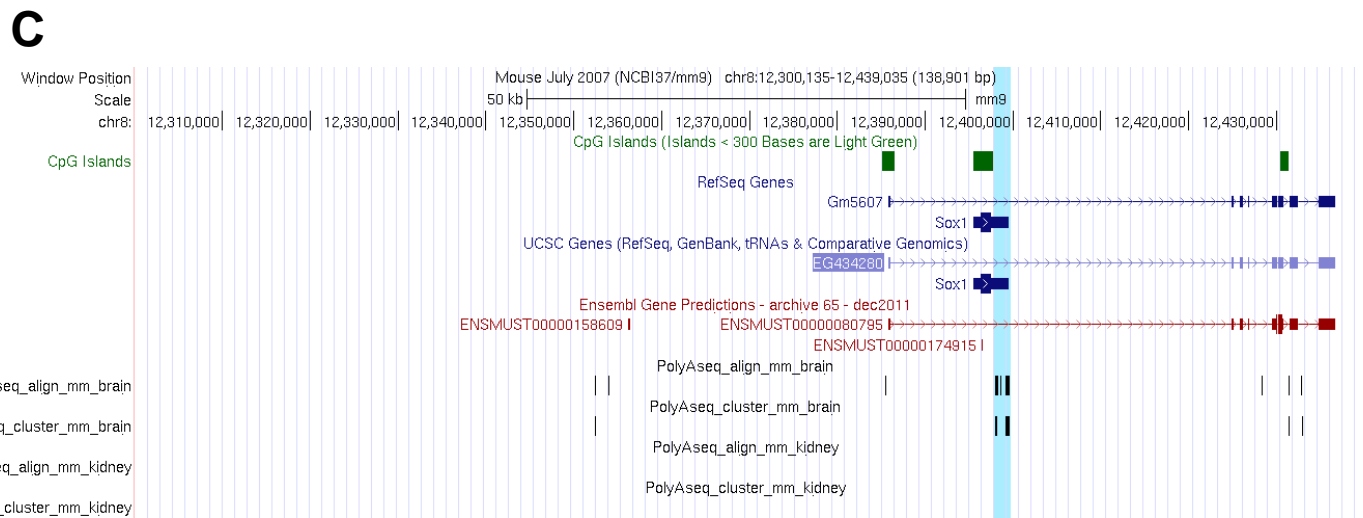

Supplement: 18_2017_2580_MOESM5_ESM.pdf [file 18_2017_2580_MOESM5_ESM.pdf]
